# Supplementary material for: Intensified Aleutian Low induces weak Pacific Decadal Variability
Source: Copernicus journal article supplement (doi:10.5194/egusphere-2023-1595), 2023-07-26
Supplement: Supplementary file 1 [file egusphere-2023-1595-supplement.pdf]

1 **Supporting Information for Intensified Aleutian Low induces weak Pacific Decadal**  
2 **Variability by Dow et al. submitted to Environmental Research Letters**

3  
4  
5  
6  
7  
8

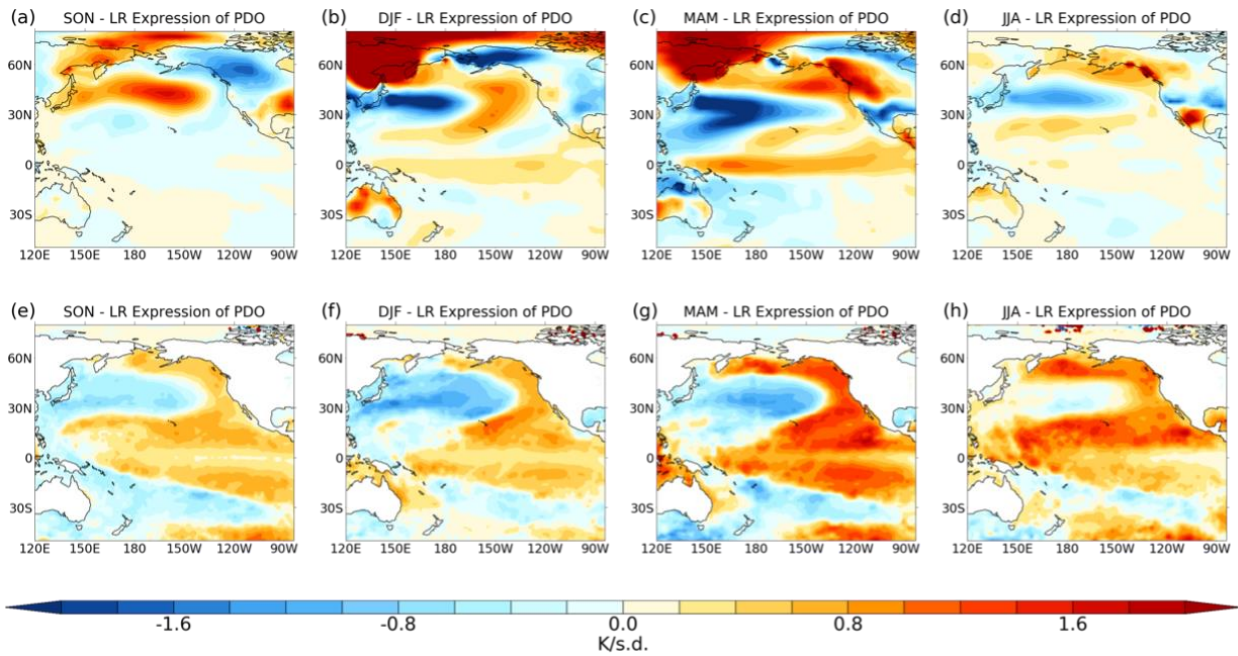

9  
10 **Figure S1:** (a-d) Seasonal mean surface temperature anomalies regressed onto the PDO  
11 index in CONTROL scaled by 5x for comparison with HadISST data (panels e-h). Units:  
12 K per standard deviation.

13  
14  
15  
16  
17  
18

19

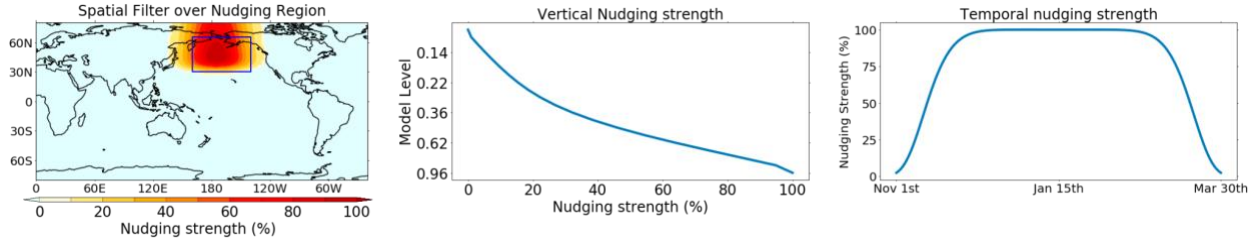

20

21

22 **Figure S2:** Details of the nudging kernel used for the NUDGED experiment. (a) Horizontal  
23 variation, (b) vertical variation and (c) temporal variation.

24

25

26

27

28

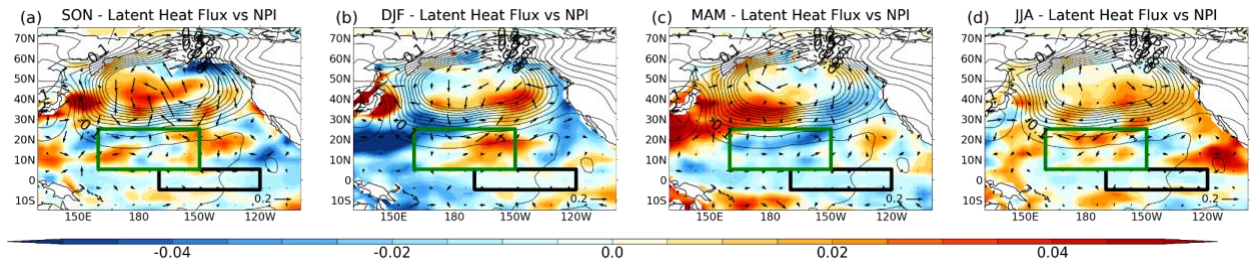

29

30 **Figure S3:** Seasonal 3-month mean of latent heat flux (shading;  $W m^{-2} / \sigma$ ), sea level  
31 pressure (contours;  $hPa / \sigma$ ) and near-surface wind (vectors;  $m s^{-1} / \sigma$ ) anomalies  
32 regressed onto the NPI. Green and black boxes represent the two regions over which the  
33 mixed layer heat budget analysis is conducted in Figure 3.

34
